# 1 **Non-stimulated regions in early visual cortex encode the contents of** 2 **conscious visual perception**

3 Bianca M. van Kemenade\*<sup>1,2,5</sup>, Gregor Wilbertz<sup>3,5</sup>, Annalena Müller<sup>4,5</sup>, Philipp Sterzer<sup>5</sup>

4 <sup>1</sup>*Institute of Neuroscience and Psychology, University of Glasgow, UK*

5 <sup>2</sup>*Department of Psychiatry and Psychotherapy, Philipps-University Marburg, Germany*

6 <sup>3</sup>*Department of Psychology, Freie Universität Berlin, Germany*

7 <sup>4</sup>*Department of Experimental and Biological Psychology, University of Potsdam, Germany*

8 <sup>5</sup>*Department of Psychiatry and Psychotherapy, Charité Campus Mitte, Berlin, Germany*

9

10 **\*Correspondence:** [biancavankemenade@gmail.com](mailto:biancavankemenade@gmail.com)

11 **Keywords:** predictive coding, bistable perception, feedback processing, fMRI, MVPA

12

13

## 14 **Abstract**

15 Predictions shape our perception. The theory of predictive processing poses that our brains make  
16 sense of incoming sensory input by generating predictions, which are sent back from higher to lower  
17 levels of the processing hierarchy. These predictions are based on our internal model of the world  
18 and enable inferences about the hidden causes of the sensory input data. It has been proposed that  
19 conscious perception corresponds to the currently most probable internal model of the world.  
20 Accordingly, predictions influencing conscious perception should be fed back from higher to lower  
21 levels of the processing hierarchy. Here, we used functional magnetic resonance imaging (fMRI) and  
22 multivoxel pattern analysis to show that non-stimulated regions of early visual areas contain  
23 information about the conscious perception of an ambiguous visual stimulus. These results indicate  
24 that early sensory cortices in the human brain receive predictive feedback signals that reflect the  
25 current contents of conscious perception.

26

27

## 28 **Introduction**

29 Predictions play an important role in perception<sup>1</sup>. According to the theory of predictive processing,  
30 our brains use an internal model of the world to make predictions that are fed back from higher to  
31 lower levels of the processing hierarchy, thereby enabling inferences about the hidden causes of the  
32 sensory input data<sup>2,3</sup>. This framework might provide the key to a neuroscientific account of  
33 conscious perceptual experiences, one of the greatest challenges for theories of human brain  
34 function. Within the framework of predictive processing, it has been proposed that conscious  
35 perception corresponds to the currently most probable internal model of the world, that is, the  
36 model that makes the best predictions about the incoming sensory data<sup>4</sup>. From this  
37 conceptualization of conscious perception as reflecting a predictive model, it follows that predictions  
38 generated by this model should be fed back from higher to lower levels of the processing hierarchy.  
39 However, empirical studies supporting this idea are lacking. In the current study, we investigated  
40 whether predictive feedback signals that reflect the current contents of conscious perception can be  
41 observed in non-stimulated regions of human early visual cortex. Non-stimulated visual regions do  
42 not receive any bottom-up stimulation, therefore any information in these regions must come from  
43 higher visual areas through feedback connections. This approach has successfully been used in  
44 several previous studies, showing for example that feedback signals contain information not only  
45 about which visual scene is presented<sup>5</sup>, but also about the spatial frequency of the scene<sup>6</sup>. High-field  
46 fMRI studies have confirmed that decoded information in non-stimulated visual areas is due to  
47 feedback mechanisms, as this information was present in superficial cortical layers, where feedback  
48 signals arrive, and not the middle cortical layers, which process feedforward input<sup>7</sup>. Measuring  
49 neural activity in regions of retinotopic visual cortex that do not receive feedforward input thus  
50 provides an elegant way to isolate effects of predictive feedback signalling in the human brain. Here,  
51 we used this method to probe whether the actual contents of conscious visual perception, too,  
52 would be reflected by neural signals in non-stimulated regions of early visual cortex. We used an  
53 ambiguous motion stimulus that gives rise to bistable perception (i.e., spontaneous alternations

54 between two perceptual states) and that was partially occluded. Decoding the two perceived visual  
55 interpretations of the constant ambiguous stimulus, rather than two distinct stimuli, from non-  
56 stimulated visual regions would thus enable us to identify the presence of feedback signals reflecting  
57 the current conscious percept.

58

## 59 **Results**

60 During fMRI scanning, participants were presented with ambiguous plaid-motion stimuli, composed  
61 of two gratings moving in different directions (fig. 1A)<sup>8</sup>. The luminance of gratings and intersections  
62 was chosen such that the stimuli could be perceived either as two gratings moving in different  
63 directions (hereafter referred to as ‘component perception’) or as one pattern moving in the  
64 average direction of the two gratings (‘pattern perception’). We used four different stimulus  
65 configurations: The angle between the gratings could be 60° or 150°, and the average motion  
66 direction was either leftward or rightward. Crucially, one quadrant of the stimulus was always  
67 occluded, which allowed us to analyse fMRI signals in non-stimulated parts of retinotopic visual  
68 areas.

69 Participants were asked to fixate the central fixation cross and indicate transitions between  
70 component and pattern percepts via button presses. Trials in which no perceptual transitions were  
71 reported were excluded. Eye tracking was performed and used for a control analysis, in which we  
72 discarded runs with poor fixation performance. Functional localisers of the stimulated area,  
73 occluded area, and border in between, as well as standard retinotopic mapping procedures, were  
74 used to delineate regions of interest for early visual regions that responded to our stimuli and for  
75 those representing the non-stimulated quadrant. For an additional control analysis, we used a V5  
76 localiser to define hMT+/V5. We then applied multi-voxel pattern analysis using a linear support-  
77 vector-machine classifier to decode participants’ perception from both stimulated and non-  
78 stimulated regions of visual cortex for each stimulus configuration, and averaged decoding

79 accuracies across conditions. Permutation tests were performed to determine significance (see  
80 figure S1 and Supplementary Methods for details).

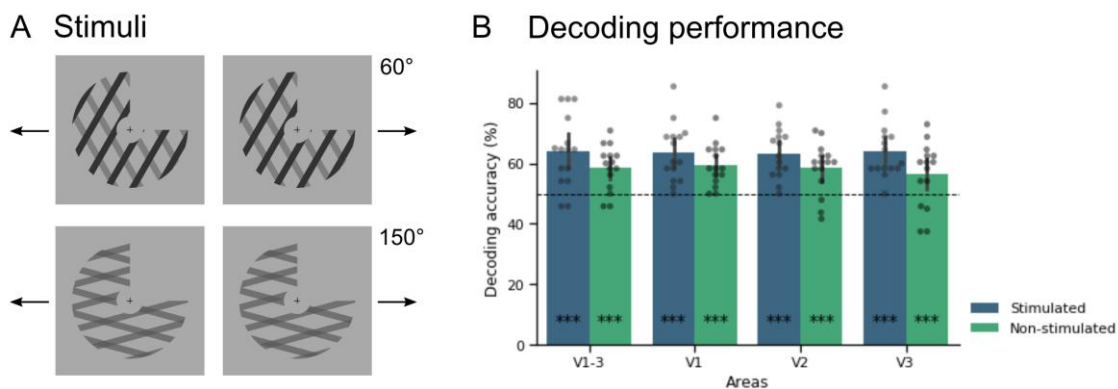

81  
82 **Fig. 1.** A) Ambiguous moving plaid stimuli were presented in four different stimulus configurations,  
83 which differed in the angle between the two component gratings (60° or 150°) and the overall  
84 motion direction of the resulting pattern (leftward or rightward). B) Classifier accuracy discriminating  
85 component and pattern perception across all stimulus configurations for stimulated and non-  
86 stimulated regions of early retinotopic areas. Error bars represent 95% confidence interval (CI).  
87 \* $p < 0.05$ , \*\* $p < 0.01$ , \*\*\* $p < 0.001$ .

88  
89 As displayed in figure 1B, significant above-chance decoding performance was obtained for  
90 both stimulated (64.1%,  $p < 0.001$ ) and non-stimulated (58.6%,  $p < 0.001$ ) regions of areas V1-V3  
91 together. Decoding performance also reached significance in each of the retinotopic areas  
92 separately (V1: 63.4% stimulated, 59.4% non-stimulated; V2: 63.3% stimulated, 58.4% non-  
93 stimulated; V3: 64% stimulated, 56.3% non-stimulated; all  $p < 0.001$ ). Our control analysis in which  
94 runs with poor fixation performance were discarded led to comparable results (see fig. S2 and  
95 Supplementary methods and results for details). Furthermore, when we corrected for the difference  
96 in number of voxels between our stimulated and non-stimulated regions, we still obtained  
97 significant above-chance decoding results (see fig. S3 and Supplementary methods and results for  
98 details).

99           According to the predictive processing theory, predictions about incoming sensory data are  
100 fed back from higher visual areas. In the case of plaid motion stimuli, area hMT+/V5 has been  
101 reported to be differentially activated during component vs. pattern motion<sup>9</sup> and is therefore a likely  
102 candidate for the origin of feedback signalling. Here, we replicated the previous finding of greater  
103 hMT+/V5 activity during component motion compared to pattern motion (fig. S5). More critically,  
104 we additionally tested whether perceptual states could also be decoded from hMT+/V5 activity in a  
105 subsample of participants, as this area should be able to represent the different percepts if it feeds  
106 back predictions about these stimuli. This proof-of-concept analysis revealed that indeed the  
107 component and pattern percepts could be decoded from hMT+/V5 with high accuracy (69.0%,  $p <$   
108 0.001, see fig. S4 and Supplementary methods and results for details).

109

## 110 **Discussion**

111 Our findings show that the current perceptual state during bistability can be decoded from fMRI  
112 signal patterns not only in stimulated early visual regions, which is in line with previous studies<sup>10</sup>, but  
113 crucially also in non-stimulated retinotopic visual cortex, which did not receive any bottom-up input.  
114 This suggests that non-stimulated regions of early visual cortex contain information not only about  
115 visual stimulation in the surrounding context, as previously shown<sup>5</sup>, but even about conscious  
116 perception independent of visual stimulation *per se*. This is in line with current theories that model  
117 bistable perception within the framework of predictive processing<sup>4,11</sup>. According to this view,  
118 ambiguous stimuli (such as the bistable moving plaids used here) provide equally strong sensory  
119 evidence for two different percepts, but the currently dominant percept establishes an implicit  
120 prediction regarding the cause of the sensory input. This prediction is thought to stabilize the  
121 current perceptual state through feedback from higher to lower hierarchical levels, while sensory  
122 evidence for the currently suppressed perceptual interpretation elicits prediction errors that act to  
123 destabilize the current percept, eventually leading to a perceptual change<sup>12,13</sup>. Here, we for the first  
124 time provide evidence supporting the notion of feedback signalling of predictions in bistable

125 perception. Along these lines, we suggest that the percept-related information that we found in non-  
126 stimulated regions of early visual areas most likely arises from feedback signalling that originates  
127 from higher-level areas concerned with the computation of component vs. pattern motion  
128 perception, such as area hMT+/V5<sup>9</sup>. Our significant decoding results in hMT+/V5 support the idea  
129 that this area generates the predictions that are sent back to early visual areas, though future  
130 studies will have to provide direct causal evidence.

131 In conclusion, our current results provide compelling support for the notion that conscious  
132 perception reflects an internal model that generates predictions about the current state of the  
133 world, and that these predictions are fed back to the lowest levels of sensory processing to enable  
134 inferences regarding the sensory input.

135

#### 136 **Acknowledgments**

137 PS received support from the German Research Foundation (DFG grants STE 1430/7-1 and STE  
138 1430/8-1).

139

#### 140 **Author contributions**

141 Conceptualisation, B.v.K. and P.S.; Methodology, B.v.K., G.W., and A.M.; Investigation, G.W. and  
142 A.M.; Formal analysis, B.v.K.; Writing – Original draft, B.v.K.; Writing – Review & Editing, B.v.K., G.W.,  
143 A.M., and P.S.; Funding acquisition, P.S.

144

#### 145 **Declaration of interests**

146 The authors declare no competing interests.

147

#### 148 **References**

- 149 1. Lange FP De, Heilbron M, Kok P. How Do Expectations Shape Perception ? *Trends Cogn Sci*.  
150 2018;(June). doi:10.1016/j.tics.2018.06.002.

- 151 2. Friston K. A theory of cortical responses. *Philos Trans R Soc B Biol Sci*. 2005;360:815-836.  
152 doi:10.1098/rstb.2005.1622.
- 153 3. Rao RPN, Ballard DH. Predictive coding in the visual cortex: a functional interpretation of  
154 some extra-classical receptive-field effects. *Nat Neurosci*. 1999;2(1):79-87. doi:10.1038/4580.
- 155 4. Hohwy J, Roepstorff A, Friston K. Predictive coding explains binocular rivalry: An  
156 epistemological review. *Cognition*. 2008;108(3):687-701.  
157 doi:10.1016/j.cognition.2008.05.010.
- 158 5. Smith FW, Muckli L. Nonstimulated early visual areas carry information about surrounding  
159 context. *Proc Natl Acad Sci*. 2010;107(46):20099-20103. doi:10.1073/pnas.1000233107.
- 160 6. Revina Y, Petro LS, Muckli L. Cortical feedback signals generalise across different spatial  
161 frequencies of feedforward inputs. *Neuroimage*. 2017;180:280-290.  
162 doi:10.1016/j.neuroimage.2017.09.047.
- 163 7. Muckli L, De Martino F, Vizioli L, et al. Contextual Feedback to Superficial Layers of V1. *Curr*  
164 *Biol*. 2015;25(20):2690-2695. doi:10.1016/j.cub.2015.08.057.
- 165 8. van Kemenade BM, Seymour K, Christophel TB, Rothkirch M, Sterzer P. Decoding pattern  
166 motion information in V1. *Cortex*. 2014;57:177-187. doi:10.1016/j.cortex.2014.04.014.
- 167 9. Castelo-Branco M, Formisano E, Backes W, et al. Activity patterns in human motion-sensitive  
168 areas depend on the interpretation of global motion. *Proc Natl Acad Sci*. 2002;99(21):13914-  
169 13919. doi:10.1073/pnas.202049999.
- 170 10. Haynes JD, Rees G. Predicting the stream of consciousness from activity in human visual  
171 cortex. *Curr Biol*. 2005;15(14):1301-1307. doi:10.1016/j.cub.2005.06.026.
- 172 11. Brascamp J, Sterzer P, Blake R, Knapen T. Multistable Perception and the Role of the  
173 Frontoparietal Cortex in Perceptual Inference. *Annu Rev Psychol*. 2018;69:77-103.
- 174 12. Weilhammer V, Stuke H, Hesselmann G, Sterzer P, Schmack K. A predictive coding account  
175 of bistable perception - a model-based fMRI study. *PLoS Comput Biol*. 2017;13(5):1-21.  
176 doi:10.1371/journal.pcbi.1005536.

- 177 13. Weilhammer V, Fritsch M, Chikermane M, et al. Evidence for an Active Role of Inferior  
178 Frontal Cortex in Conscious Experience. *bioRxiv*. 2020.  
179 doi:<https://doi.org/10.1101/2020.05.28.114645>.  
180



## 1 **Supplementary methods**

2

### 3 *Subjects*

4 Sixteen participants took part in the study. Data from one participant had to be excluded, because  
5 this participant reported only one percept in certain conditions, so that the other percept of the  
6 respective condition could not be modelled (see fMRI analysis). This resulted in a final sample of 15  
7 participants (age 18-33, M = 23.5 years, SD = 4.22, 5 male). None of the participants reported  
8 current or previous neurological or psychiatric disorders. All had normal or corrected-to-normal  
9 vision and were right-handed. Besides these general criteria, inclusion was based on performance in  
10 a previous behavioural session with the same ambiguous plaid stimuli. An average perceptual phase  
11 duration of > 4 s and a balance of at least 80/20 between the two percepts in each possible stimulus  
12 configuration (pattern and component perception, see Stimuli) were required to be selected for the  
13 fMRI session. The study was approved by the local ethics committee, and participants gave written  
14 informed consent.

15

### 16 *Stimuli*

17 Plaid stimuli were created by superimposing two individual component square-wave gratings. The  
18 stimuli were designed to be perceptually ambiguous, yielding bistable perception with spontaneous  
19 alternations between perception of either the two components moving in different directions  
20 ('component perception') or of one pattern moving in the average direction of the two gratings  
21 ('pattern perception'). The angle between the components could be 60° or 150°, but for both angles  
22 the average motion direction between the two gratings was horizontal, either leftward or rightward,  
23 resulting in four stimulus configurations (60° left, 60° right, 150° left, 150° right) that all elicited  
24 bistability between component and pattern perception. fMRI results were pooled across these four  
25 stimulus configurations, as they were not relevant to the purpose of the present study. The  
26 individual gratings had a spatial frequency of 0.5 cycles per degree of visual angle and a duty cycle of

27 0.3. The term 'duty cycle' refers to the proportion of the width of the darker bars within one cycle of  
28 the grating. The speed of the individual gratings was 1.3 cycles/s for the 60° stimuli, and 0.39  
29 cycles/s for the 150° stimuli. The speed of the resulting plaid stimuli was 1.5 cycles/s for all stimulus  
30 configurations.

31

32 The plaid stimuli were presented within a centred annulus with a diameter of 13° of visual angle. In  
33 the centre of the annulus, which had a diameter of 3°, a fixation cross was presented. The  
34 background surrounding the stimuli had a luminance of 40 cd/m<sup>2</sup>. The luminance of the gratings of  
35 the 150° stimuli was 14 cd/m<sup>2</sup>. For the 60° stimuli, the two component gratings differed in  
36 luminance: one grating had 2 cd/m<sup>2</sup>, the other 20 cd/m<sup>2</sup>. The luminance of the intersections of the  
37 gratings was determined in pilot experiments that aimed at approximate equiprobability of  
38 component and pattern perception for all stimulus types and resulted in an intersection luminance  
39 of 9 cd/m<sup>2</sup> for the 150° stimuli and 2 cd/m<sup>2</sup> for the 60° stimuli.

40

#### 41 *Procedure*

42 The stimuli were presented on a screen at the end of the MRI scanner bore. Participants laid in the  
43 scanner in supine position and viewed the stimuli on the screen through an angled mirror. They  
44 were asked to fixate on the central fixation cross and report their percept (pattern or component  
45 perception) by button presses. They had to report their percept as soon as the stimulus was  
46 presented, and press a button anytime their percept changed. A pattern percept was reported with  
47 the right index finger, and a component percept with the right middle finger. Each run comprised  
48 eight trials, lasting 60 s each, during which a plaid stimulus was continuously presented in one of the  
49 four stimulus configurations. Each trial was followed by a 10 s fixation interval, during which only the  
50 fixation cross was presented. Each stimulus configuration was presented twice per run in  
51 pseudorandomised order. There were six runs in total.

52

53 After the main experiment, two functional localisers were presented. The first was a stimulus  
54 localiser. Here, each stimulus from the main experiment was presented for 12 s, followed by fixation  
55 for 8 s, in a block-design. Different from the main experiment, participants were asked to fixate only  
56 and not report their perception. All conditions were presented four times in total. This functional  
57 stimulus localiser allowed for selection of voxels that were activated by the stimuli used in the main  
58 experiment. Furthermore, we used a functional localiser that mapped the non-stimulated region and  
59 was designed to preclude any spill-over of activity from the stimulated region, similar to the localiser  
60 of Smith & Muckli (2010). During this localiser, participants viewed contrast-reversing checkerboard  
61 stimuli (4Hz), which were again presented for 12 s each, followed by 8 s of fixation. Each condition  
62 was repeated 8 times. The localiser contained ‘surround stimuli’, mapping the border between  
63 stimulated and non-stimulated regions, and ‘target stimuli’, mapping the non-stimulated region. The  
64 surround stimulus was presented at 0.5° of visual angle diagonally from the fixation cross, mapping  
65 the outer 1° of the non-stimulated quadrant (see figure S1A). The checkerboard representing the  
66 non-stimulated quadrant, i.e. the target stimulus, was presented at 1° diagonally from the surround  
67 stimulus (see figure S1B). Thus, the target region, from which voxels were selected for our decoding  
68 analysis of the non-stimulated quadrant, was ~2° away from the stimulated region. The scanning  
69 session ended with a structural T1 scan (MPRAGE). Standard phase-encoded retinotopic mapping  
70 was performed in a separate scanning session to define regions V1-3.

71

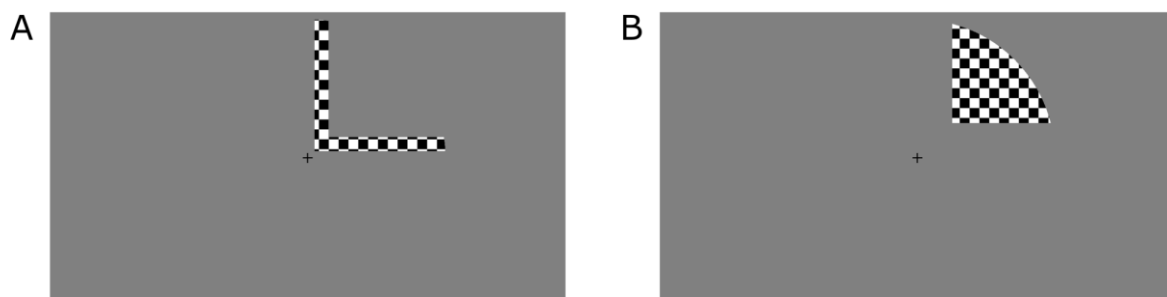

72

73 **Fig. S1.** A) The surround stimulus mapping the border between stimulated and non-stimulated  
74 regions. B) The target stimulus mapping the non-stimulated quadrant.

75

#### 76 *Scanning parameters*

77 Functional MRI data were acquired using a 3 T TIM Trio scanner (Siemens, Erlangen, Germany),  
78 equipped with a 12-channel head-coil. A gradient echo EPI sequence was used (TR: 2 sec, TE: 30  
79 msec, flip angle: 78°, voxel size 2.3 x 2.3 x 2.3 mm). Slices were oriented parallel to the calcarine  
80 sulcus and acquired in descending order. A total of 135 volumes were acquired for each run of the  
81 main experiment, 163 volumes for the stimulus localiser, 163 volumes for the non-stimulated  
82 quadrant localiser, 123 volumes per run (3 in total) for the polar angle retinotopic mapping, and 102  
83 volumes per run (3 in total) for eccentricity mapping. Anatomical images were obtained using an  
84 MPRAGE sequence (TR: 1.9 sec, TE: 2.52 msec, flip angle: 9°).

85

#### 86 *Eye movements*

87 Eye movements were recorded with an iView Xtm MRI-LR system [SensoMotoric Instruments (SMI),  
88 Teltow, Germany] using a sampling rate of 50 Hz. Due to technical difficulties, no usable eye tracking  
89 data were obtained for four participants, and for one run of a fifth participant. The eye tracking data  
90 were used in a control analysis to discard runs with poor fixation performance. To determine fixation  
91 performance, a radius of 1.5° from fixation was defined as the fixation area. Eye movements beyond  
92 this area were considered as outliers. Data were detrended and mean-corrected to determine the  
93 number of these outliers, and runs in which eye movements extended beyond 1.5° of fixation in  
94 more than 5% of all data points were excluded. A total of 10 runs distributed across 5 participants  
95 were excluded in the control analysis based on eye tracking exclusion criteria.

96

#### 97 *fMRI analysis*

98 The fMRI data were preprocessed and analysed using SPM12. First, the functional images were  
99 realigned to correct for head motion, after which they were coregistered with the structural image  
100 obtained in the same session. Then, both functional and structural images were coregistered with  
101 the structural image obtained in the retinotopy session. No normalisation or smoothing was applied,  
102 as is common for studies using MVPA.

103 A general linear model (GLM) was set up with regressors modelling the participants' percepts  
104 (pattern vs components) of each condition, resulting in eight regressors of interest. Motion  
105 parameters as well as a regressor modelling fixation in between trials were included as regressors of  
106 no interest. If participants reported only one percept for a certain condition, the other percept of  
107 that condition could not be modelled in that run; therefore, such runs were excluded. This affected  
108 all runs from one participant, and another 7 runs distributed across 3 participants.

109

#### 110 *ROI definition*

111 Regions of interest (ROIs) were defined with similar methods as those used by Smith & Muckli  
112 (2010). First, regions V1-V3 were defined using standard retinotopic mapping procedures. Within  
113 regions V1-3, only the voxels that showed significant positive response to the stimulated region (t-  
114 contrast stimulus > fixation,  $p < 0.01$  uncorr.) in our stimulus localiser were selected. For the non-  
115 stimulated region, the following procedure was used. First, only voxels that showed significant  
116 positive response to the target region (t-contrast stimulus > fixation,  $p < 0.01$  uncorr.) were selected.  
117 Then, in order to ensure that these voxels were not also responsive to the stimulated region, we  
118 further selected only the voxels that met these criteria: significant positive response to the non-  
119 stimulated target area alone ( $t > 1.65$ ,  $p < 0.01$  uncorr.), no significant response to the stimulated  
120 area alone ( $t > 1.65$ ,  $p < 0.01$  uncorr.), and no significant response to the surround region ( $t > 1.65$ ,  $p$   
121  $< 0.01$  uncorr.).

122 The stimulated ROIs were naturally larger than the non-stimulated ROIs, as the stimulus spanned  
123 three quadrants compared to one occluded quadrant. Furthermore, our strict criteria for selecting

124 non-stimulated voxels outlined above meant we only selected a small sample of the voxels  
125 corresponding to the occluded quadrant. To correct for potential biases induced by this difference in  
126 ROI size, we performed an additional control analysis with smaller stimulated ROIs that had the  
127 same number of voxels as their non-stimulated counterpart ROI. These ROIs were generated by  
128 manually selecting voxels corresponding to the stimulus quadrant immediately opposite the  
129 occluded quadrant, in our case the quadrant in the upper left visual field. As such, we selected  
130 voxels in the right hemisphere below the calcarine sulcus. From these voxels, we randomly selected  
131  $n$  voxels, with  $n$  being the number of voxels of the non-stimulated ROI for that particular visual area  
132 (V1-3) and participant. For two participants, not enough voxels were available in the respective  
133 stimulated quadrant of V1 to match the number of voxels from the non-stimulated V1 ROI. For these  
134 two participants, we therefore used all the voxels available in the stimulated quadrant and thus had  
135 slightly less voxels in stimulated V1 ROI compared to the non-stimulated V1 ROI (for one participant  
136 12 stimulated voxels vs 15 non-stimulated voxels, for the other participant 6 stimulated voxels vs 24  
137 non-stimulated voxels).

138

139 *MVPA*

140

141 Multi-voxel pattern analysis (MVPA) was performed using The Decoding Toolbox (Hebart, Gorgen, &  
142 Haynes, 2015), which implements LibSVM software (<http://www.csie.ntu.edu.tw/~wcjlin/libsvm>). A  
143 linear support vector machine was trained to discriminate pattern from component percepts based  
144 on the beta values resulting from the GLM. This classification was performed for each stimulus  
145 configuration separately. Classifier performance was tested using a leave-one-run-out cross-  
146 validation approach. Training was carried out on all but one run, which served as the test data. This  
147 was repeated until all runs had served as a test run once. The decoding accuracy was averaged  
148 across cross-validations and then across conditions. Permutation testing was conducted to  
149 determine the significance at the group level as described by Stelzer, Chen, & Turner (2013). In brief,

150 we provided the classifier with all possible combinations of shuffled label assignments for each  
151 participant and performed the decoding procedure for each label assignment. Then, we randomly  
152 selected one of these decoding accuracies from each participant and calculated the mean decoding  
153 accuracy. This procedure of random selection and calculation of mean decoding accuracy was  
154 repeated 10,000 to generate a distribution of decoding accuracies. We then used a cut-off of 95% to  
155 determine significance of our results.

156

## 157 **Supplementary results**

158

### 159 *Phase durations*

160 The mean perceptual phase duration of the 60° stimuli (averaged across leftward and rightward  
161 moving stimuli) was 7.4 s for components (SD = 8.6) and 9.9 s for patterns (SD = 4.6). For the 150°  
162 stimuli, mean phase duration for components was 8.2 s (SD = 7.5) and for patterns 4.9 s (SD = 1.7).

163

### 164 *Control analysis discarding runs with poor fixation performance*

165 Overall fixation accuracy across all participants was 97.3%. Despite this high accuracy, we performed  
166 a control analysis discarding runs with fixations more than 5% outside of our fixation ROI. As  
167 displayed in figure S2, significant above-chance decoding performance was obtained for both  
168 stimulated (64.0%,  $p < 0.001$ ) and non-stimulated (58.9%,  $p < 0.001$ ) regions of areas V1-V3 together.  
169 Decoding performance also reached significance in each of the retinotopic areas separately (V1:  
170 62.9% stimulated,  $p < 0.001$ , 57.8% non-stimulated,  $p = 0.015$ ; V2: 62.4% stimulated,  $p < 0.001$ , 58.0%  
171 non-stimulated,  $p = 0.007$ ; V3: 63.0% stimulated,  $p < 0.001$ , 56.7% non-stimulated,  $p < 0.001$ ).

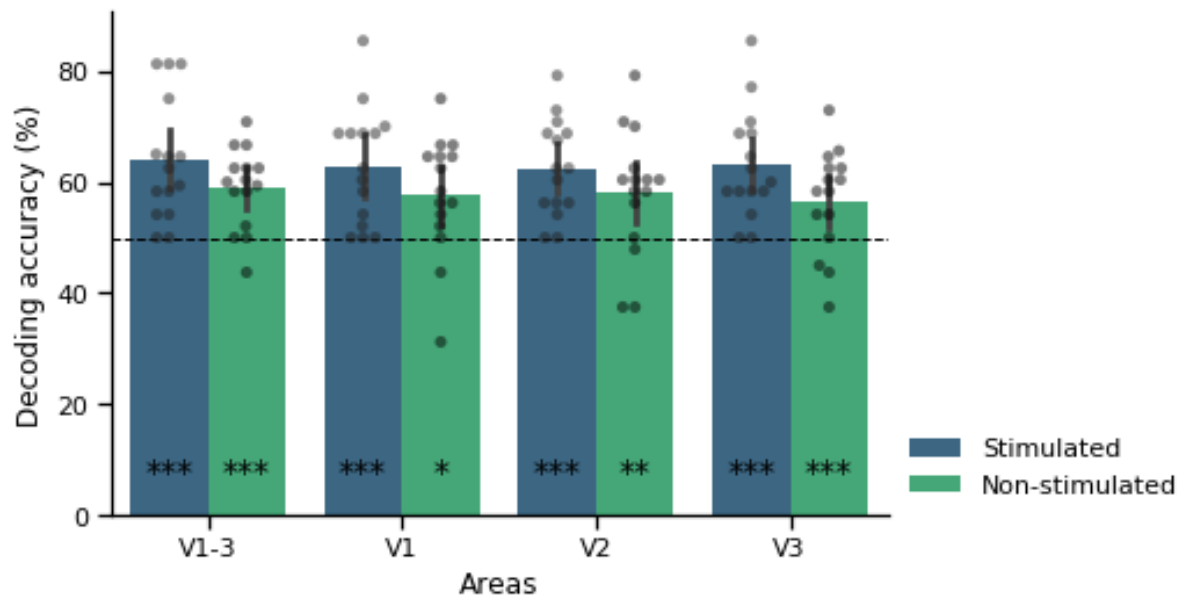

172

173 **Fig. S2.** Classifier accuracy discriminating component and pattern perception across all stimulus  
174 configurations for stimulated and non-stimulated regions of early retinotopic areas. In this analysis,  
175 runs with poor fixation performance were excluded. Error bars represent 95% confidence interval  
176 (CI). \* $p < 0.05$ , \*\* $p < 0.01$ , \*\*\* $p < 0.001$ .

177

178 *Control analysis correcting for the difference in number of voxels between stimulated and non-*  
179 *stimulated ROIs*

180 In this analysis, we decoded from stimulated and non-stimulated ROIs that were matched in size. As  
181 displayed in figure S2, significant above-chance decoding performance was obtained for both  
182 stimulated (60.9%,  $p < 0.001$ ) and non-stimulated (58.6%,  $p < 0.001$ ) regions of areas V1-V3 together.  
183 Decoding performance also reached significance in each of the retinotopic areas separately (V1:  
184 55.2% stimulated, 59.4% non-stimulated; V2: 56.5% stimulated, 58.4% non-stimulated; V3: 59.2%  
185 stimulated, 56.3% non-stimulated, all  $p < 0.001$ ).



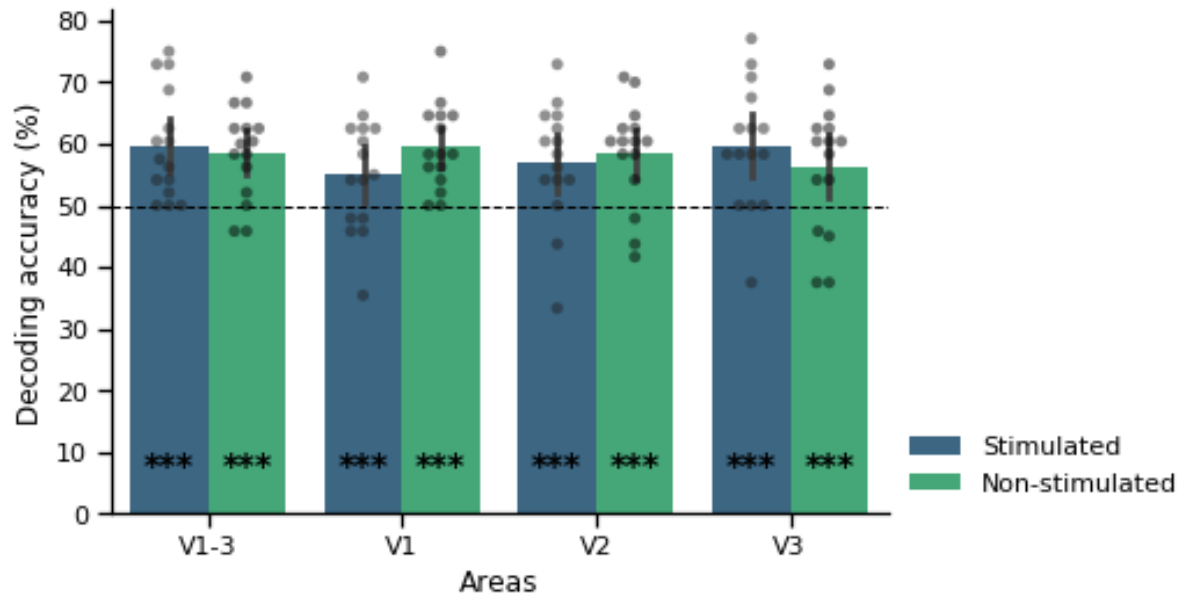

186

187 **Fig. S3.** Classifier accuracy discriminating component and pattern perception across all stimulus  
188 configurations for stimulated and non-stimulated regions of early retinotopic areas. In this analysis,  
189 the number of voxels in stimulated V1 ROIs matched those of non-stimulated V1 ROIs. Error bars  
190 represent 95% confidence interval (CI). \* $p < 0.05$ , \*\* $p < 0.01$ , \*\*\* $p < 0.001$ .

191

192

193 *Control analysis decoding from hMT+/V5*

194 hMT+/V5 localiser data were available for 10 of our subjects. From these hMT+/V5 ROIs, we could  
195 decode component vs pattern percepts significantly above chance (69.0%,  $p < 0.001$ ; see figure S4).

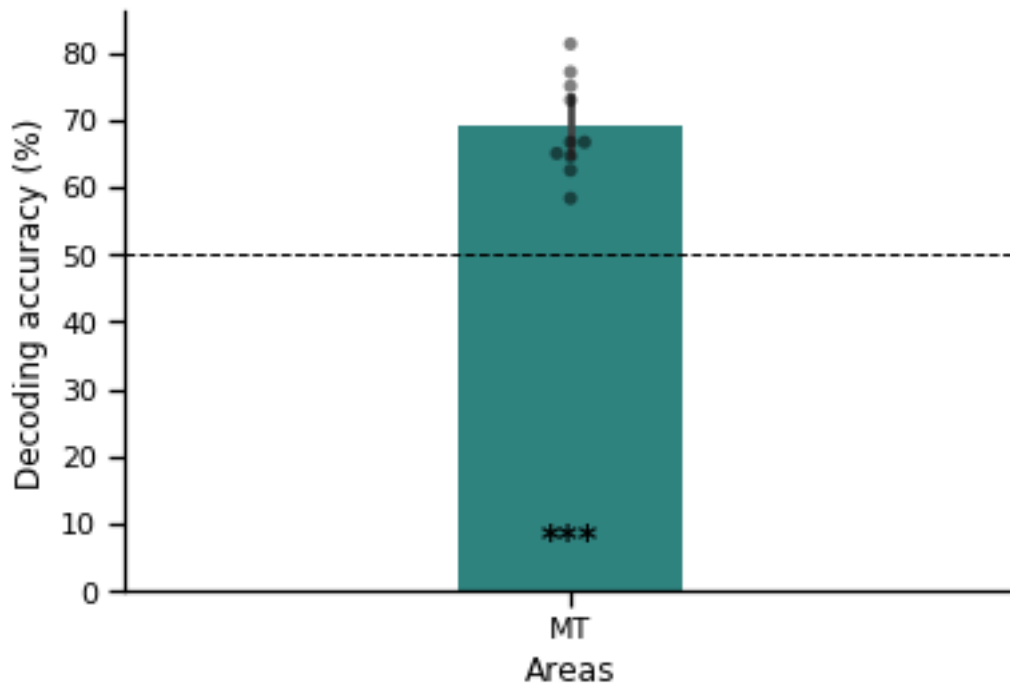

196

197 **Fig. S4.** Classifier accuracy discriminating component and pattern perception across all stimulus  
198 configurations for area hMT+/V5. Error bars represent 95% confidence interval (CI). \* $p < 0.05$ ,  
199 \*\* $p < 0.01$ , \*\*\* $p < 0.001$ .

200

#### 201 *Control analysis testing for non-specific effects in early visual cortex*

202 In order to test whether non-specific effects related to the change in perception and resulting  
203 decision making influenced our results, we performed a univariate analysis contrasting component  
204 with pattern percepts and vice versa. To this end, data preprocessing included coregistration of  
205 functional and anatomical images, normalisation to MNI space and smoothing with an 8mm full  
206 width at half maximum kernel. The same GLM was run as was used for our MVPA analysis. T-  
207 contrasts of components > patterns and patterns > components were passed on to group level T-  
208 tests. An initial voxel threshold of  $p < 0.001$  uncorrected was used with FWE cluster correction to  
209 determine significance.

210 Since it has been shown that components elicit more activity in hMT+/V5 than patterns (Castelo-  
211 Branco et al., 2002), we expected clusters in hMT+/V5 for the contrast components > patterns. As

212 such we performed a ROI analysis using an anatomical mask of hMT+/V5 from the anatomy toolbox.  
213 This contrast indeed revealed clusters in bilateral hMT+/V5, supporting the results by Castelo-Branco  
214 et al. (2002). No other clusters reached significance. The reverse contrast, patterns > components,  
215 also yielded no significant clusters. These results suggest that no non-specific effects influenced our  
216 decoding results in visual cortex.

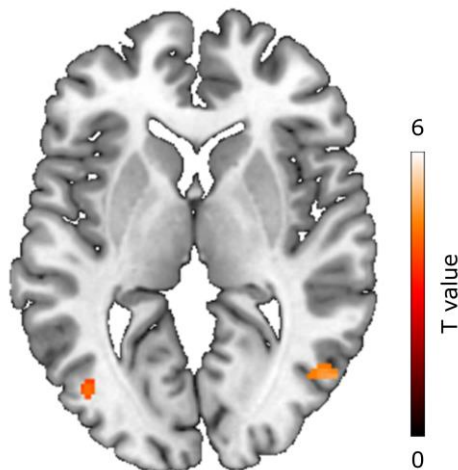

217  
218 **Fig. S5.** Univariate analysis showing increased activity for components compared to patterns in  
219 bilateral hMT+/V5. ROI analysis with anatomical hMT+/V5 ROI from the anatomy toolbox using an  
220 initial voxel threshold of  $p < 0.001$ , uncorrected, showing FWE cluster corrected results.

221  
222 **References**

223 Castelo-Branco M, Formisano E, Backes W, et al. Activity patterns in human motion-sensitive  
224 areas depend on the interpretation of global motion. *Proc Natl Acad Sci.* 2002;99(21):13914-  
225 13919. doi:10.1073/pnas.202049999.

226 Hebart, M. N., Gorgen, K., & Haynes, J.-D. (2015). The Decoding Toolbox ( TDT ): a versatile software  
227 package for multivariate analyses of functional imaging data. *Frontiers in Neuroinformatics,*  
228 8(January), 1–18. <http://doi.org/10.3389/fninf.2014.00088>

229 Smith, F. W., & Muckli, L. (2010). Nonstimulated early visual areas carry information about  
230 surrounding context. *Proceedings of the National Academy of Sciences, 107*(46), 20099–20103.

231 <http://doi.org/10.1073/pnas.1000233107>

232 Stelzer, J., Chen, Y., & Turner, R. (2013). Statistical inference and multiple testing correction in

233 classification-based multi-voxel pattern analysis (MVPA): Random permutations and cluster size

234 control. *NeuroImage*, 65, 69–82. <http://doi.org/10.1016/j.neuroimage.2012.09.063>

235
